# Supplementary material
Source: publisher figshare collection journal article supplement (https://future-science-group.figshare.com/ndownloader/files/30793501)
Supplement: Supplementary file 1 [file 30793501]

**Supplementary Material**

| **Supplementary Table 1. Diagnosis and ICD-9-CM, ICD-10-CM Codes** | | |
| --- | --- | --- |
| Diagnosis | ICD-9 Codes | ICD-10 Codes |
| Schizophrenia* | 295.xx | F20, F21, F25, F06.2 |
| Psychotic disorders* | 298.8x, 298.9x | F23, F24, F28, F29 |
| Bipolar Disorder* | 296.0x, 296.1x, 296.5x, 296.6x, 296.7x, 296.8x | F30 (Manic episode)  F31 (Bipolar disorder) |
| Major Depressive Disorder* | 296.2x, 296.3x | F32, F33 |
| Depression | 296.2x, 296.3x, 296.82, 298.0, 300.4, 311 | F32, F33, F34.1 |
| Unspecified mood disorder | 296.9 | F39 |
| Autistic disorder* | 299.0x | F84.0 |
| Pervasive developmental disorder | 299.0-299.1, 299.8, 317.xx, 318.xx, 319.xx | F84.x |
| Tourette’s disorder* | 307.23 | F95.2 |
| Anxiety | 300.xx | F06.4, F40, F41 |
| Generalized anxiety disorder* | 300.02 | F41.1 |
| Attention deficit/hyperactivity disorders (ADHD) | 314.xx | F90 |
| Disruptive behavior disorders | 309.3, 312.0x - 312.4x,  312.8x - 312.9x, 313.81 | F91, F92 |
| Alcohol/substance abuse | 292.xx, 304.xx, 305.2x-305.9x | F10-F19 |
| Dementia | 290.0, 290.1x, 290.2x. 290.3, 290.4x, 291.2, 294.10, 294.11, 294.21, 331.0, 331.1, 331.2, 331.7, 331.82, 331.89, 331.9 | F00, F01, F02, F03 |
| Other mental disorder diagnoses | 290-319, not defined above | F01-F99, not defined above |
| *ICD-9 and ICD-10 codes were used in identifying on-label or off-label use | | |
